# Supplementary material for: Melatonin, Zinc, and Vitamin C: Potential Adjuvant Treatment for COVID-19 Patients
Source: PubMed Central journal article supplement (PMC8826215; doi:10.3389/fnut.2021.821824), 2022-01-26
Supplement: Table_1.pdf [file Table_1.pdf]

## SUPPLEMENTARY MATERIAL

**Table S1. Electronic search strategy on PubMed database.**

| <b>Electronic search strategy</b>                                                  |
|------------------------------------------------------------------------------------|
| 1. COVID-19 OR coronavirus OR SARS-CoV-2                                           |
| 2. intervention OR trial OR randomized controlled trial OR RCT or observational    |
| 3. melatonin OR N-acetyl-5-methoxytryptamine OR zinc OR vitamin C OR ascorbic acid |
| 4. (#1) AND (#2) AND (#3) AND                                                      |

Note: The literature search was conducted from inception to October 04 (2021).
