# Supplementary material for: Melatonin, Zinc, and Vitamin C: Potential Adjuvant Treatment for COVID-19 Patients
Source: PubMed Central journal article supplement (PMC8826215; doi:10.3389/fnut.2021.821824), 2022-01-26
Supplement: Table_2.pdf [file Table_2.pdf]

## SUPPLEMENTARY MATERIAL

**Table S2. Studies involving randomized controlled trials with nutritional/nutraceutical approaches for the therapy in COVID-19 patients.**

| Melatonin   |                                                                          |                                                           |                    |     |             |            |                    |          |                     |
|-------------|--------------------------------------------------------------------------|-----------------------------------------------------------|--------------------|-----|-------------|------------|--------------------|----------|---------------------|
| Identifier  | Intervention/treatment                                                   | Primary Outcome Measures                                  | Last Update Posted | n   | Prim. Purp. | Start Date | Estim. Compl. Date | Ages     | Status              |
| NCT04474483 | Melatonin; Placebo (Methylcellulose)                                     | Cumulative Incidence of Treatment-Emergent Adverse Events | Nov 2020           | 30  | T           | Nov 2020   | Mar 2021           | ≥18      | Recruiting          |
| NCT04784754 | Melatonin; Placebo                                                       | Cumulative Incidence of Treatment-Emergent Adverse Events | Mar 2021           | 50  | T           | Mar 2021   | Dec 2021           | ≥18      | Not yet recruiting  |
| NCT04531748 | Toremifene; Melatonin; Placebo                                           | Peak increase in COVID-19 Sign and Symptom score          | May 2021           | 0   | T           | Aug 2020   | Sep 2022           | >18      | Withdrawn (Funding) |
| NCT04568863 | Melatonin intravenous; Placebo intravenous                               | Mortality                                                 | Mar 2021           | 18  | T           | Jun 2020   | Nov 2020           | ≥18      | Completed           |
| NCT04530539 | Vitamin C; melatonin; Placebo; Symptom Survey                            | Symptom Severity                                          | Feb 2021           | 150 | SC          | Oct 2020   | Dec 2021           | >50      | Recruiting          |
| NCT04353128 | Melatonin; Placebo                                                       | SARS-CoV2 infection rate                                  | Jun 2020           | 450 | P           | Ap 2020    | Dec 2020           | 18-65    | Recruiting          |
| NCT04470297 | Ramelteon (melatonin agonist)                                            | Time to resolution of symptoms                            | Jul 2020           | 100 | T           | Sep 2020   | Mar 2021           | 18       | Not yet recruiting  |
| NCT04570254 | Vitamin C; Vitamin E; Melatonin; Drug: N-acetyl cysteine; Pentoxifylline | Death from any cause                                      | May 2021           | 110 | T           | Aug 2020   | Dec 2020           | All ages | Completed           |

| Vitamin C   |                                                                                                                                                                                                                                                                                                                                                                                                                                                                                     |                                                                                                      |                    |     |             |            |                    |          |                                                                 |  |
|-------------|-------------------------------------------------------------------------------------------------------------------------------------------------------------------------------------------------------------------------------------------------------------------------------------------------------------------------------------------------------------------------------------------------------------------------------------------------------------------------------------|------------------------------------------------------------------------------------------------------|--------------------|-----|-------------|------------|--------------------|----------|-----------------------------------------------------------------|--|
| Identifier  | Intervention/treatment                                                                                                                                                                                                                                                                                                                                                                                                                                                              | Primary Outcome Measures                                                                             | Last Update Posted | n   | Prim. Purp. | Start Date | Estim. Compl. Date | Ages     | Status                                                          |  |
| NCT04664010 | Alpha-interferon alpha, abidol, ribavirin, Buzhong Yiqi plus and minus formula, Huhuang Detoxicity Paste, Baimu Qingre Jiedu Paste, fumigation/inhalation of vitamin C; Alpha-interferon, abidol, ribavirin, Buzhong Yiqi plus and minus formula, Huhuang Detoxicity Paste, Baimu Qingre Jiedu Paste and 5% glucose; Alpha-interferon, abidol, ribavirin, Buzhong Yiqi plus and minus formula, Huhuang Detoxicity Paste, Baimu Qingre Jiedu Paste and high-dose vitamin C treatment | Recovery time                                                                                        | Dec 2020           | 60  | T           | Feb 2020   | Jan 2021           | 18-70    | Active, not recruiting                                          |  |
| NCT04363216 | Ascorbic Acid                                                                                                                                                                                                                                                                                                                                                                                                                                                                       | Clinical Improvement                                                                                 | May 2020           | 66  | T           | May 2020   | May 2021           | 18       | Not yet recruiting                                              |  |
| NCT04347889 | Hydroxychloroquine; Vitamin C                                                                                                                                                                                                                                                                                                                                                                                                                                                       | COVID-19 Seroconversion rate                                                                         | Nov 2020           | 0   | P           | Apr 2020   | Dec 2020           | 18       | Withdrawn (Evidence that HCQ ineffective, loss of HCW interest) |  |
| NCT04323514 | Vitamin C                                                                                                                                                                                                                                                                                                                                                                                                                                                                           | In-hospital mortality                                                                                | Mar 2020           | 500 | T           | Mar 2020   | Mar 2021           | All Ages | Recruiting                                                      |  |
| NCT04710329 | Ascorbic acid                                                                                                                                                                                                                                                                                                                                                                                                                                                                       | Short term mortality; Length of Intensive Care Unit Stay                                             | Feb 2021           | 78  | R           | Jan 2021   | Feb 2021           | 18-99    | Completed                                                       |  |
| NCT04530539 | Vitamin C; melatonin; Placebo; Symptom Survey                                                                                                                                                                                                                                                                                                                                                                                                                                       | Symptom Severity                                                                                     | Feb 2021           | 150 | SC          | Oct 2020   | Dec 2021           | 50       | Recruiting                                                      |  |
| NCT04558424 | Zinc gluconate and ascorbic acid                                                                                                                                                                                                                                                                                                                                                                                                                                                    | symptoms reduction time frame                                                                        | Sep 2020           | 50  | SC          | Oct 2020   | Sep 2021           | 18-70    | Not yet recruiting                                              |  |
| NCT04468139 | Quercetin; bromelain; Zinc; Vitamin C                                                                                                                                                                                                                                                                                                                                                                                                                                               | Days of stay at hospital after treatment and discharge; serum zinc before and after treatment        | Jul 2020           | 60  | T           | Jun 2020   | Jul 2020           | 18       | Recruiting                                                      |  |
| NCT04357782 | L-ascorbic acid                                                                                                                                                                                                                                                                                                                                                                                                                                                                     | Incidence of adverse events; Incidence of serious adverse reactions; Incidence of adverse reactions; | Dec 2020           | 20  | T           | Apr 2020   | Oct 2020           | 18-99    | Completed                                                       |  |
| NCT04395768 | Vitamin C; Hydroxychloroquine; Azithromycin; Zinc Citrate; Vitamin D3; Vitamin B12                                                                                                                                                                                                                                                                                                                                                                                                  | Symptoms; Length of hospital stay; invasive mechanical ventilation or mortality                      | Sep 2020           | 200 | T           | Sep 2020   | Dec 2021           | 18       | Recruiting                                                      |  |
| NCT04401150 | Vitamin C; Control                                                                                                                                                                                                                                                                                                                                                                                                                                                                  | Death or persistent organ dysfunction                                                                | Mar 2021           | 800 | T           | Aug 2020   | Jan 2022           | 18       | Recruiting                                                      |  |
| NCT04342728 | Ascorbic Acid; Zinc Gluconate; Ascorbic Acid and Zinc Gluconate; Standard of Care                                                                                                                                                                                                                                                                                                                                                                                                   | Symptom Reduction                                                                                    | Feb 2021           | 214 | SC          | Apr 2020   | Feb 2021           | 18       | Completed                                                       |  |

|             |                                                                                                            |                                                                                                                                                                                                                                           |          |      |   |          |          |          |                                                           |
|-------------|------------------------------------------------------------------------------------------------------------|-------------------------------------------------------------------------------------------------------------------------------------------------------------------------------------------------------------------------------------------|----------|------|---|----------|----------|----------|-----------------------------------------------------------|
| NCT04828538 | Vitamin D; Omega DHA / EPA; Vitamin C, Vitamin B complex and Zinc Acetate                                  | Efficacy for COVID infection prevention; Efficacy for treatment of severe COVID disease                                                                                                                                                   | Apr 2021 | 3600 | O | Mar 2021 | Jul 2021 | 18       | Recruiting                                                |
| NCT04344184 | L-ascorbic acid; Placebo                                                                                   | Change in COVID disease status                                                                                                                                                                                                            | Jun 2021 | 60   | T | Dec 2022 | Mar 2022 | 18       | Recruiting                                                |
| NCT04483960 | Nafamostat Mesilate; Convalescent plasma; Enoxaparin; Dalteparin; Tinzaparin; Aspirin                      | Death from any cause or requirement of new intensive respiratory support (invasive or non-invasive ventilation) or vasopressor/inotropic support.                                                                                         | Jun 2021 | 2400 | T | Jul      | Dec 2022 | 18       | Recruiting                                                |
| NCT04712357 | Vitamin C, Oral Tablet; Tenofovir disoproxyl fumarate; Tenofovir disoproxyl fumarate plus emtricitabine.   | The time to recovery, defined at day 7 days follow up after enrollment, on which a patient met the criteria for category 1, 2, or 3 on the eight-category ordinal scale                                                                   | Jan 2021 | 219  | T | Nov 2020 | Jan 2023 | 18       | Recruiting                                                |
| NCT04780061 | Vitamin D; Vitamin C/Zinc; Vitamin K2/D; Microcrystalline Cellulose Capsule; Medium Chain Triglyceride Oil | Participant-reported overall health                                                                                                                                                                                                       | Mar 2021 | 200  | T | Apr 2021 | Dec 2021 | 18       | Not yet recruiting                                        |
| NCT04370288 | MCN (Methylene blue, vitamin C, N-acetyl cysteine)                                                         | Proportion of patients remaining free of need for mechanical ventilation in both groups                                                                                                                                                   | May 2020 | 20   | T | Apr 2020 | Sep 2020 | 18-90    | Recruiting                                                |
| NCT04335084 | Hydroxychloroquine; Vitamin C; Vitamin D; Zinc                                                             | Prevention of COVID-19 symptoms as recorded in a daily diary; Safety as determined by presence or absence of Adverse Events and Serious Adverse Events                                                                                    | Feb 2021 | 600  | P | Jun 2020 | Dec 2021 | 18       | Recruiting                                                |
| NCT04584437 | Infrared Energy and Dietary Supplement                                                                     | Treatment and Prevention of COVID-19 Pandemic                                                                                                                                                                                             | May 2021 | 0    | T | May 2021 | Jul 2022 | All Ages | Withdrawn (Funding)                                       |
| NCT04682574 | Vitamin C                                                                                                  | Partial pressure of Oxygen in arterial blood to fraction of inspired Oxygen (P/F ratio)                                                                                                                                                   | Dec 2020 | 15   | T | Nov 2020 | Jan 2021 | All Ages | Recruiting                                                |
| NCT04334967 | Hydroxychloroquine; Vitamin C                                                                              | Total Hospitalization; Total Mechanical Ventilation                                                                                                                                                                                       | Sep 2020 | 13   | T | Mar 2020 | May 2022 | 45       | Suspended (suspected unfavorable risk/benefit assessment) |
| NCT04328961 | Hydroxychloroquine Sulfate; Ascorbic Acid                                                                  | Polymerase chain reaction (PCR) confirmed SARS-CoV-2 infection; Polymerase chain reaction (PCR) confirmed SARS-CoV-2 infection                                                                                                            | Oct 2020 | 829  | P | Mar 2020 | Oct 2020 | 18       | Completed                                                 |
| NCT04830852 | ---                                                                                                        | Incidence and prevalence of medical sequelae; Risk factors for medical sequelae.                                                                                                                                                          | Apr 2021 | 5000 | P | May 2021 | May 2027 | >21      | Not yet recruiting                                        |
| NCT04264533 | VC; Sterile Water for Injection                                                                            | Ventilation-free days                                                                                                                                                                                                                     | Oct 2020 | 56   | T | Feb 2020 | Mar 2020 | 18       | Terminated                                                |
| NCT04279197 | Fuzheng Huayu Tablet; Vitamin C tablets; Placebo; respiratory function rehabilitation training             | The improvement proportion of pulmonary fibrosis                                                                                                                                                                                          | Sep 2020 | 160  | T | Apr 2020 | Dec 2021 | 18-70    | Recruiting                                                |
| NCT04446104 | Hydroxychloroquine Sulfate; Ivermectin; Zinc; Povidone-Iodine; Vitamin C                                   | Laboratory-confirmed COVID-19 in treatment arms                                                                                                                                                                                           | Oct 2020 | 4257 | P | May 2020 | Aug 2020 | 21-60    | Completed                                                 |
| NCT04570254 | Vitamin C; Vitamin E; Melatonin; N-acetyl cysteine; Pentoxifylline                                         | Death from any cause; Percentage of patients who required orotracheal intubation; Assisted mechanical ventilation; Stay in an intensive care unit                                                                                         | May 2021 | 110  | T | Aug 2020 | Dec 2020 | All Ages | Completed                                                 |
| NCT04631536 | Atorvastatin + L-arginine + Folic acid + Nicorandil + Nebivololol; Placebo                                 | Clinical Improvement                                                                                                                                                                                                                      | Mar 2021 | 80   | T | Jan 2021 | Jun 2021 | 18       | Recruiting                                                |
| NCT04334512 | Hydroxychloroquine; Azithromycin; Vitamin C; Vitamin D; Zinc                                               | The rate of recovery of mild or moderate COVID-19 in patients using Quintuple Therapy; Reduction or Progression of Symptomatic Days; Assess the safety of Quintuple Therapy; Assess the safety of Quintuple Therapy via pulse; Assess the | Apr 2021 | 600  | T | Jun 2020 | Sep 2021 | 18       | Recruiting                                                |

|             |                                                                                                                                                                                                                         |                                                                                                                                                                                                                                                                                                                                   |          |      |   |          |          |          |                        |
|-------------|-------------------------------------------------------------------------------------------------------------------------------------------------------------------------------------------------------------------------|-----------------------------------------------------------------------------------------------------------------------------------------------------------------------------------------------------------------------------------------------------------------------------------------------------------------------------------|----------|------|---|----------|----------|----------|------------------------|
|             |                                                                                                                                                                                                                         | safety of Quintuple Therapy via oxygen saturation; Assess the safety of Quintuple Therapy via EKG; Assess Tolerability of Quintuple Therapy                                                                                                                                                                                       |          |      |   |          |          |          |                        |
| NCT04668469 | Ivermectin; Hydroxychloroquine; personal protective Measures                                                                                                                                                            | Number of participants with improvement of clinical condition (symptoms and signs); Reduction of recovery time, hospital stay days and mortality rate                                                                                                                                                                             | Dec 2020 | 600  | T | Jun 2020 | Oct 2020 | 18-80    | Completed              |
| NCT04354428 | Ascorbic Acid; Hydroxychloroquine Sulfate; Azithromycin; Folic Acid; Lopinavir/ Ritonavir [Kaletra]                                                                                                                     | Lower respiratory tract infection rates; Incidence of hospitalization or mortality; Change in upper respiratory viral shedding; COVID-19 symptom resolution rates [Lopinavir-ritonavir arm only]                                                                                                                                  | Nov 2020 | 300  | T | Apr 2020 | Jan 2021 | 18-80    | Active, not recruiting |
| NCT04802382 | combination of Artemisinin 12 mg, Curcumin 40 mg, Boswellia 30 mg, and Vitamin C 120 mg in spray administration                                                                                                         | Clinical improvement in treatment groups                                                                                                                                                                                                                                                                                          | Mar 2021 | 252  | T | Apr 2021 | Dec 2021 | 18       | Not yet recruiting     |
| NCT04482686 | Ivermectin; Doxycycline Hcl; Zinc; Vitamin D3; Vitamin C                                                                                                                                                                | Time to Non-Infectivity by RT-PCR; Time to Symptom progression in days as measured by NEWS scoring system (National Early Warning Score); Time to Symptom improvement as measured by NEWS scoring system (National Early Warning Score); Efficacy of Treatment as measured by Titer; Efficacy of Treatment as measured by RT-PCR. | May 2021 | 30   | T | Dec 2020 | Jul 2022 | 18-75    | Recruiting             |
| NCT04590274 | Hydroxychloroquine; Vitamins and Minerals; Azithromycin                                                                                                                                                                 | Percentage of individuals who develop COVID-19 symptoms                                                                                                                                                                                                                                                                           | Oct 2020 | 5000 | P | Nov 2020 | Dec 2021 | All Ages | Not yet recruiting     |
| NCT04554979 | Hydroxychloroquine                                                                                                                                                                                                      | COVID-19 disease spectrum and duration; GIT manifestations among COVID-19 patients.                                                                                                                                                                                                                                               | Sep 2020 | 199  | R | Jun 2020 | Jul 2020 | 18       | Completed              |
| NCT04877509 | Selenium, Zinc and Copper, Vitamin A, D, E plasma concentrations during patient hospitalization                                                                                                                         | Selenium, Zinc and Copper, Vitamin A, D and E plasma concentrations of 229 over 50 year's patients hospitalized suffering from COVID-19.                                                                                                                                                                                          | May 2021 | 229  | O | Mar 2020 | May 2021 | 50       | Completed              |
| NCT04326725 | Plaquenil                                                                                                                                                                                                               | Protection against COVID-19                                                                                                                                                                                                                                                                                                       | Jul 2020 | 80   | P | Mar 2020 | Sep 2020 | 20-90    | Active, not recruiting |
| NCT04444271 | Mesenchymal stem cells; Placebo                                                                                                                                                                                         | Overall survival                                                                                                                                                                                                                                                                                                                  | Jun 2020 | 20   | T | May 2020 | Sep 2020 | 10       | Recruiting             |
| NCT04382040 | ArtemiC; Placebo                                                                                                                                                                                                        | Time to clinical improvement, defined as a national Early Warning Score 2 (NEWS2) of $\leq 2$ Maintained for 24 Hours in comparison to routine treatment; Percentage of participants with definite or probable drug related adverse events                                                                                        | Mar 2021 | 50   | T | May 2020 | Nov 2020 | 18       | Completed              |
| NCT04751669 | Vitamin and trace elements; Placebo                                                                                                                                                                                     | Need for hospital admission                                                                                                                                                                                                                                                                                                       | Apr 2021 | 300  | T | Apr 2021 | Dec 2021 | 18-80    | Not yet recruiting     |
| NCT04777981 | CBDRA60 supplement; Placebo                                                                                                                                                                                             | Decreased hospitalization                                                                                                                                                                                                                                                                                                         | Mar 2021 | 60   | T | Apr 2021 | May 2021 | 18       | Not yet recruiting     |
| NCT04558463 | Favipiravir; Oseltamivir                                                                                                                                                                                                | Clinical radiologic changes; Percentage of RT-PCR test conversion                                                                                                                                                                                                                                                                 | Sep 2020 | 100  | T | Apr 2020 | Oct 2020 | 18-75    | Recruiting             |
| NCT04551755 | Ivermectin and Doxycycline; Placebo                                                                                                                                                                                     | Time to outcome measure of fever ( $<100.40F$ ) and cough; Negative RT-PCR test on day 5 of treatment                                                                                                                                                                                                                             | Sep 2020 | 188  | T | Sep 2020 | Dec 2020 | 18       | Not yet recruiting     |
| NCT02735707 | Fixed-duration Hydrocortisone; Shock-dependent hydrocortisone; Ceftriaxone; Moxifloxacin or Levofloxacin; Piperacillin-tazobactam; Ceftaroline; Amoxicillin-clavulanate; Macrolide; Macrolide administered; Oseltamivir | All-cause mortality<br>Days alive and not receiving organ support in ICU                                                                                                                                                                                                                                                          | Oct 2020 | 7100 | T | Apr 2016 | Dec 2023 | 18       | Recruiting             |

|             |                                                                                                                                                                                                                                 |                                                                                                                                                                                                                                              |          |        |    |          |          |          |                               |
|-------------|---------------------------------------------------------------------------------------------------------------------------------------------------------------------------------------------------------------------------------|----------------------------------------------------------------------------------------------------------------------------------------------------------------------------------------------------------------------------------------------|----------|--------|----|----------|----------|----------|-------------------------------|
| NCT04690920 | Tocilizumab                                                                                                                                                                                                                     | Ratio of partial pressure of oxygen in arterial blood to fraction of inhaled oxygen                                                                                                                                                          | Dec 2020 | 200    | SC | Jul 2020 | Dec 2020 | All Ages | Completed                     |
| NCT04492501 | Procedure: Therapeutic Plasma exchange; Biological: Convalescent Plasma; Drug: Tocilizumab; Drug: Remdesivir<br>Biological: Mesenchymal stem cell therapy                                                                       | Survival                                                                                                                                                                                                                                     | Jul 2020 | 600    | T  | Apr 2020 | Jul 2020 | 18-90    | Completed                     |
| NCT04409483 | Drug: Lopinavir-Ritonavir Drug Combination<br>Combination Product: Standard Care                                                                                                                                                | Hospitalization or death                                                                                                                                                                                                                     | Feb 2021 | 0      | T  | Jun 2020 | Dec 2020 | 12       | Withdrawn (Epidemic dynamics) |
| NCT04323228 | Dietary Supplement: Oral supplement enriched in antioxidants<br>Dietary Supplement: cellulose-containing placebo capsules                                                                                                       | Score of Nutrition risk screening-2002 (NRS-2002); Serum ferritin; serum Interleukin-6 concentration; serum C-reactive protein concentration; serum Tumor necrosis factor- $\alpha$ concentration; serum monocyte chemoattractant protein 1. | Sep 2020 | 40     | SC | Sep 2020 | Dec 2020 | 18-65    | Recruiting                    |
| NCT04360980 | Drug: Colchicine Tablets                                                                                                                                                                                                        | CRPxN/R ratio change; Clinical deterioration by the WHO definition; PCR Viral Load; CT severity involvement index                                                                                                                            | Dec 2020 | 80     | T  | Mar 2020 | Nov 2021 | 18       | Recruiting                    |
| NCT03680274 | Drug: Vitamin C<br>Other: Control                                                                                                                                                                                               | Number of deceased participants or with persistent organ dysfunction                                                                                                                                                                         | Mar 2021 | 800    | T  | Nov 2018 | Dec 2022 | 18       | Recruiting                    |
| NCT04591600 | Drug: Ivermectin and Doxycycline<br>Drug: Standard of care                                                                                                                                                                      | Mortality rate; Rate of progression disease                                                                                                                                                                                                  | Oct 2020 | 140    | T  | Jul 2020 | Oct 2020 | 16-86    | Completed                     |
| NCT04666753 | Dietary Supplement: ImmunoFormulation                                                                                                                                                                                           | Clinical symptoms duration.                                                                                                                                                                                                                  | Dec 2020 | 40     | R  | Jul 2020 | Sep 2020 | 18       | Completed                     |
| NCT04361422 | Drug: Isotretinoin Only Product in Oral Dose Form                                                                                                                                                                               | Clinical clearance                                                                                                                                                                                                                           | Sep 2020 | 300    | T  | Dec 2020 | Dec 2021 | 18-40    | Not yet recruiting            |
| NCT04708340 | Drug: Rejuveinix (RjX) Active Comparator; Drug: Placebo Comparator                                                                                                                                                              | Tolerability and Efficacy measured by progression of disease through an ordinal scale; Efficacy measured by time to resolution of respiratory failure                                                                                        | May 2021 | 237    | T  | Mar 2021 | Feb 2023 | 18       | Recruiting                    |
| NCT04853199 | Drug: Quercetin; Drug: Placebo                                                                                                                                                                                                  | The Efficacy measurement                                                                                                                                                                                                                     | Jun 2021 | 200    | T  | Jun 2021 | Aug 2021 | 18       | Not yet recruiting            |
| NCT04551339 | Dietary Supplement: PreserVision AREDS formulation soft gels or tablets; Dietary Supplement: Multivitamin with 11mg of zinc                                                                                                     | COVID-19 illness requiring hospitalization                                                                                                                                                                                                   | Mar 2021 | 4500   | O  | Sep 2020 | Sep 2021 | 18-90    | Active, not recruiting        |
| NCT04507867 | Dietary Supplement: Nutritional support system (NSS); Other: Control                                                                                                                                                            | Complications in patients with COVID-19 in stage III with comorbidities                                                                                                                                                                      | Aug 2020 | 240    | SC | Aug 2020 | Dec 2020 | 35-75    | Not yet recruiting            |
| NCT04353180 | Isotretinoin (13 cis retinoic acid); capsules+standard treatment; Isotretinoin (Aerosolized 13 cis retinoic acid)+standard treatment; Isotretinoin (13 cis retinoic acid); Aerosolized 13 cis retinoic acid; Standard treatment | Lung injury score                                                                                                                                                                                                                            | Apr 2021 | 100000 | T  | Apr 2021 | Jul 2021 | 18-80    | Not yet recruiting            |
| NCT04851821 | Drug: Quercetin                                                                                                                                                                                                                 | Number of patients                                                                                                                                                                                                                           | Jun 2021 | 80     | T  | Jan 2021 | Jun 2021 | 18       | Recruiting                    |

| Zinc        |                                                                                                                   |                                                                                                                                                                                                                                                                                                             |                    |      |             |            |                    |            |                                             |  |
|-------------|-------------------------------------------------------------------------------------------------------------------|-------------------------------------------------------------------------------------------------------------------------------------------------------------------------------------------------------------------------------------------------------------------------------------------------------------|--------------------|------|-------------|------------|--------------------|------------|---------------------------------------------|--|
| Identifier  | Intervention/treatment                                                                                            | Primary Outcome Measures                                                                                                                                                                                                                                                                                    | Last Update Posted | n    | Prim. Purp. | Start Date | Estim. Compl. Date | Ages       | Status                                      |  |
| NCT04641195 | Vitamin D3 (cholecalciferol); Zinc (zinc gluconate); Zinc (zinc gluconate) & Vitamin D (cholecalciferol); Placebo | Time to recovery                                                                                                                                                                                                                                                                                            | Ap 2021            | 700  | T           | Ap 2021    | Mar 2022           | >=18       | Recruiting                                  |  |
| NCT04558424 | zinc gluconate and ascorbic acid                                                                                  | symptoms reduction time frame                                                                                                                                                                                                                                                                               | Sep 2020           | 50   | SC          | Oct 2020   | Sep 2021           | 18-70      | Not yet recruiting                          |  |
| NCT04828538 | Vitamin D; Omega DHA / EPA; Vitamin C, Vitamin B complex and Zinc Acetate                                         | Efficacy for COVID infection prevention; Efficacy for treatment of severe COVID disease                                                                                                                                                                                                                     | Ap 2021            | 3600 | O           | Mar 2021   | Jul 2021           | ≥18        | Recruiting                                  |  |
| NCT04370782 | Hydroxychloroquine; Azithromycin; Zinc Sulfate; Doxycycline                                                       | Time to Resolution of Symptoms relative to baseline; Time to Resolution of Symptoms relative to baseline; Time to Resolution; Number of participants hospitalized and/or requiring repeat ER visits; Number of participants hospitalized and/or requiring repeat ER visits; ICU Length of Stay; Ventilator. | Dec 2020           | 18   | T           | Apr 2020   | Sep 2020           | ≥ 30       | Completed                                   |  |
| NCT04542993 | Zinc Picolinate; Resveratrol; Zinc Picolinate Placebo; Resveratrol Placebo                                        | Reduction in SARS-CoV-2 Viral load; Reduction in Severity of COVID-19 Disease.                                                                                                                                                                                                                              | Mar 2021           | 60   | SC          | Sep 2020   | Jun 2022           | 18-75      | Active, not recruiting                      |  |
| NCT04468139 | Quercetin; bromelain; Zinc; Vitamin C                                                                             | Days of stay at hospital after treatment and discharge; serum zinc before and after treatment.                                                                                                                                                                                                              | Jul 2020           | 60   | T           | Jun 2020   | Jul 2020           | ≥ 18 years | Recruiting                                  |  |
| NCT04377646 | Hydroxychloroquine; Hydroxychloroquine (placebo); Zinc; Zinc (Placebo)                                            | SARS CoV2 infection;                                                                                                                                                                                                                                                                                        | May 2020           | 660  | P           | May 2020   | Jul 2020           | 18-65      | Not yet recruiting                          |  |
| NCT04447534 | Chloroquine; Zinc                                                                                                 | Number of patients with improvement or mortality.                                                                                                                                                                                                                                                           | Dec 2020           | 200  | T           | Jun 2020   | Oct 2030           | ≥18        | Recruiting                                  |  |
| NCT04351490 | Zinc gluconate; 25-OH cholecalciferol                                                                             | Survival rate in asymptomatic subjects at inclusion                                                                                                                                                                                                                                                         | Mar 2021           | 0    | T           | Apr 2020   | Jul 2020           | 60         | Withdrawn (change study design and funding) |  |
| NCT04342728 | Ascorbic Acid; Zinc Gluconate; Ascorbic Acid and Zinc Gluconate; Standard of Care.                                | Symptom Reduction.                                                                                                                                                                                                                                                                                          | Feb 2021           | 214  | SC          | Apr 2020   | Feb 2021           | ≥ 18       | Completed                                   |  |
| NCT04472585 | Ivermectin Injectable Solution; Injectable Placebo; Zinc; Placebo empty capsule; Oral Ivermectin.                 | qRT-PCR; Time taken for alleviation of symptoms; Severity of symptoms.                                                                                                                                                                                                                                      | Feb 2021           | 180  | T           | Nov 2020   | Oct 2021           | 18-60      | Recruiting                                  |  |
| NCT04877509 | Biological: Selenium, Zinc and Copper, Vitamin A, D, E plasma concentrations during patient hospitalization       | Selenium, Zinc and Copper, Vitamin A, D and E plasma concentrations of 229 over 50 year's patients hospitalized suffering from COVID-19.                                                                                                                                                                    | May 2021           | 229  | O           | Mar 2020   | May 2021           | 50         | Completed                                   |  |
| NCT04407572 | Serum zinc, vitamin d vitamin b12 levels.                                                                         | Serum zinc, vitamin d vitamin b12 deficiency levels                                                                                                                                                                                                                                                         | Jun 2020           | 44   | P           | Apr 2020   | Jun 2020           | 18-45      | Completed                                   |  |
| NCT04584567 | Doxycyclin                                                                                                        | Decreasing the number of cases infected with covid 19                                                                                                                                                                                                                                                       | Feb 2021           | 1100 | P           | Nov 2020   | Mar 2021           | 18-65      | Recruiting                                  |  |

|             |                                                                                                                             |                                                                                                                                                                                                                                                                                                                                                                                                |          |      |   |          |          |            |                                                          |
|-------------|-----------------------------------------------------------------------------------------------------------------------------|------------------------------------------------------------------------------------------------------------------------------------------------------------------------------------------------------------------------------------------------------------------------------------------------------------------------------------------------------------------------------------------------|----------|------|---|----------|----------|------------|----------------------------------------------------------|
| NCT04395768 | Vitamin C; Hydroxychloroquine; Azithromycin; Zinc Citrate<br>Vitamin D3; Vitamin B12.                                       | Symptoms; Length of hospital stay; invasive mechanical ventilation or mortality                                                                                                                                                                                                                                                                                                                | Sep 2020 | 200  | T | Sep 2020 | Dec 2021 | ≥ 18 years | Recruiting                                               |
| NCT04621461 | Zinc Sulfate 220 MG; Placebo                                                                                                | Number of participants hospitalized and/or requiring repeat emergency room visits; Number of participants admitted to the Intensive care unit; Number of participants on a ventilator.                                                                                                                                                                                                         | Feb 2021 | 3    | T | Dec 2020 | Feb 2021 | 30         | Completed                                                |
| NCT04780061 | Vitamin D3 50,000 IU; Vitamin C/Zinc; Vitamin K2/D;<br>Microcrystalline Cellulose Capsule; Medium Chain<br>Triglyceride Oil | Participant-reported overall health                                                                                                                                                                                                                                                                                                                                                            | Mar 2021 | 200  | T | Apr 2021 | Dec 2021 | ≥18        | Not yet recruiting                                       |
| NCT04335084 | Hydroxychloroquine; Vitamin C; Vitamin D; Zinc                                                                              | Prevention of COVID-19 symptoms as recorded in a daily diary; Safety as determined by presence or absence of Adverse Events and Serious Adverse Events                                                                                                                                                                                                                                         | Feb 2021 | 600  | P | Jun 2020 | Dec 2021 | 18         | Recruiting                                               |
| NCT04551339 | PreserVision AREDS; Multivitamin with zinc                                                                                  | COVID-19 illness requiring hospitalization                                                                                                                                                                                                                                                                                                                                                     | Mar 2021 | 4500 | O | Sep 2020 | Sep 2021 | 18-90      | Active, not recruiting                                   |
| NCT04446104 | Hydroxychloroquine Sulfate Tablets; Ivermectin 3mg Tab;<br>Zinc; Povidone-Iodine; Vitamin C.                                | Laboratory-confirmed COVID-19 in treatment arms (hydroxychloroquine, ivermectin, zinc and povidone iodine)                                                                                                                                                                                                                                                                                     | Oct 2020 | 4257 | P | May 2020 | Aug 2020 | 21-60      | Completed                                                |
| NCT04392427 | Combination of Nitazoxanide, Ribavirin and Ivermectin for a duration of seven days.                                         | Negative test result for COVID-19                                                                                                                                                                                                                                                                                                                                                              | Sep 2020 | 100  | T | Oct 2020 | May 2022 | 12         | Not yet recruiting                                       |
| NCT04798677 | ABBC1 Immunoessential; Placebo                                                                                              | Change in the acute immune response to the influenza vaccine after supplementation; Change in the delayed immune response to the influenza vaccine after supplementation; Change in the acute immune response to the Covid-19 vaccine after supplementation; Change in the delayed immune response to the Covid-19 vaccine after supplementation; Change in blood levels of selenium and zinc. | Mar 2021 | 90   | O | Oct 2020 | Apr 2021 | 18         | Recruiting                                               |
| NCT04326725 | Plaquenil                                                                                                                   | Protection against COVID-19                                                                                                                                                                                                                                                                                                                                                                    | Jul 2020 | 80   | P | Mar 2020 | Sep 2020 | 20-90      | Active, not recruiting                                   |
| NCT04435587 | Ivermectin Pill; Combined ART/hydroxychloroquine                                                                            | Adverse event rates; Efficacy for shortening duration of SAR-CoV2 detection by PCR                                                                                                                                                                                                                                                                                                             | Jun 2021 | 80   | T | Jul 2020 | Nov 2021 | 18         | Recruiting                                               |
| NCT04528927 | HCQ; Azithromycin; Doxycycline; Zinc                                                                                        | Evaluate the rate of patients cured at the end of the study; Evaluate the rate of patients are pauci-symptomatic at the end of the study.                                                                                                                                                                                                                                                      | Aug 2020 | 0    | T | May 2020 | Jul 2020 | 18-80      | Withdrawn (Interest in the use of HCQ is controversial.) |
| NCT04631536 | Atorvastatin + L-arginine + Folic acid + Nicorandil +<br>Nebivolol; Placebo                                                 | Clinical Improvement                                                                                                                                                                                                                                                                                                                                                                           | Mar 2021 | 80   | T | Jan 2021 | Jun 2021 | 18         | Recruiting                                               |
| NCT04334512 | Hydroxychloroquine; Azithromycin; Vitamin C; Vitamin D;<br>Zinc                                                             | The rate of recovery of mild or moderate COVID-19 in patients using Quintuple Therapy; Reduction or Progression of Symptomatic Days; Assess the safety of Quintuple Therapy; Assess the safety of Quintuple Therapy via pulse; Assess the safety of Quintuple Therapy via oxygen saturation; Assess the safety of Quintuple Therapy via EKG; Assess Tolerability of Quintuple Therapy          | Apr 2021 | 600  | T | Jun 2020 | Sep 2021 | 18         | Recruiting                                               |

|             |                                                                                     |                                                                                                                                                                                                                                                                                                                                    |          |      |    |          |          |          |                    |
|-------------|-------------------------------------------------------------------------------------|------------------------------------------------------------------------------------------------------------------------------------------------------------------------------------------------------------------------------------------------------------------------------------------------------------------------------------|----------|------|----|----------|----------|----------|--------------------|
| NCT04668469 | Ivermectin; Hydroxychloroquine; personal protective Measures.                       | Number of participants with improvement of clinical condition (symptoms and signs); Reduction of recovery time, hospital stay days and mortality rate                                                                                                                                                                              | Dec 2020 | 600  | T  | Jun 2020 | Oct 2020 | 18-80    | Completed          |
| NCT04482686 | Ivermectin; Doxycycline Hcl; Zinc; Vitamin D3; Vitamin C                            | Time to Non-Infectivity by RT-PCR; Time to Symptom progression in days as measured by NEWS scoring system (National Early Warning Score); Time to Symptom improvement as measured by NEWS scoring system (National Early Warning Score); Efficacy of Treatment as measured by Titer; Efficacy of Treatment as measured by RT-PCR   | May 2021 | 30   | T  | Dec 2020 | Jul 2022 | 18-75    | Recruiting         |
| NCT04810728 | Extract Psidii guava; Standard therapy for Covid-19 patient                         | Changes of inflammatory cells and marker                                                                                                                                                                                                                                                                                           | Apr 2021 | 90   | T  | Jun 2020 | Jan 2021 | 13-59    | Completed          |
| NCT04384458 | Hydroxychloroquine; Ivermectin                                                      | Proportion of participants in whom there was a positivity for SARS-CoV-2.                                                                                                                                                                                                                                                          | Oct 2020 | 400  | P  | Jul 2020 | Apr 2021 | 18-70    | Recruiting         |
| NCT04554979 | Hydroxychloroquine Pill                                                             | Non-communicable disease and COVID-19; Seasonal change and COVID-19; Possible region-specific classification for COVID-19 disease.                                                                                                                                                                                                 | Sep 2020 | 199  | R  | Jun 2020 | Jul 2020 | 18       | Completed          |
| NCT04590274 | Hydroxychloroquine; Vitamins and Minerals; Azithromycin                             | Percentage of individuals who develop COVID-19 symptoms                                                                                                                                                                                                                                                                            | Oct 2020 | 5000 | P  | Nov 2020 | Dec 2021 | All ages | Not yet recruiting |
| NCT04666116 | Dietary supplementation                                                             | Viral load during the period of admission to the nasopharyngeal smear.                                                                                                                                                                                                                                                             | Dec 2020 | 96   | T  | Apr 2020 | Feb 2021 | 18-99    | Recruiting         |
| NCT04621149 | Chlorine dioxide; zinc acetate; Famotidine; placebo; lactoferrin, green tea extract | Reduction in Participant Symptoms of COVID-19                                                                                                                                                                                                                                                                                      | Dec 2020 | 120  | T  | Nov 2020 | Mar 2021 | 20-70    | Recruiting         |
| NCT04485130 | Disulfiram; Placebo                                                                 | Immunologic impact of 5 days of disulfiram, as measured by the fold-change in plasma levels of pro-inflammatory cytokines (e.g., interleukin 6, interleukin 1-beta, etc.).                                                                                                                                                         | Dec 2020 | 60   | T  | May 2020 | Apr 2021 | 18       | Recruiting         |
| NCT04507867 | Nutritional support system; Control                                                 | Complete clinical and dietary history, complete blood count, blood chemistry, D-dimer, coagulation times, bleeding time and prothrombin time, fibrinogen, serum electrolytes, serum homocysteine levels, serum levels of 25 hydroxycholecalciferol, triceps fold and arm circumference, % muscle mass, % fat, BMI, weight, height. | Aug 2020 | 240  | SC | Aug 2020 | Dec 2020 | 30-75    | Not yet recruiting |
| NCT04371952 | Doxycycline, placebo                                                                | Percentage of Patients with Clinical Respiratory Aggravation; Percentage of patients hospitalized; Percentage of patients requiring ventilatory assistance                                                                                                                                                                         | May 2020 | 330  | T  | Jun 2020 | Dec 2020 | > 45     | Not yet recruiting |
| NCT04523831 | Ivermectin and Doxycycline; Standard of care                                        | Number of Patients with Early Clinical Improvement; Number of Participants With Late Clinical Recovery.                                                                                                                                                                                                                            | Oct 2020 | 400  | T  | Jun 2020 | Sep 2020 | 18       | Completed          |
| NCT04751669 | Vitamin and trace elements; Placebo                                                 | Need for hospital admission                                                                                                                                                                                                                                                                                                        | Apr 2021 | 300  | T  | Apr 2021 | Dec 2021 | 18-80    | Not yet recruiting |
| NCT04666753 | Immuno Formulation                                                                  | Clinical symptoms duration.                                                                                                                                                                                                                                                                                                        | Dec 2020 | 40   | R  | Jul 2020 | Sep 2020 | 18       | Completed          |
| NCT04777981 | CBDRA60 supplement; Placebo.                                                        | Decreased hospitalization.                                                                                                                                                                                                                                                                                                         | Mar 2021 | 60   | T  | Apr 2021 | May 2021 | 18       | Not yet recruiting |
| NCT04323228 | Oral supplement enriched in antioxidants; cellulose-containing placebo              | Score of Nutrition risk screening-2002 (NRS); Serum ferritin level; Serum Interleukin-6; Serum C-reactive protein concentration; Serum Tumor necrosis factor- $\alpha$ concentration; Serum monocyte chemoattractant protein 1.                                                                                                    | Sep 2020 | 40   | SC | Sep 2020 | Dec 2020 | 18-65    | Recruiting         |



|             |                                                                                                                                                                                                         |                                                                   |          |     |    |          |          |       |                         |
|-------------|---------------------------------------------------------------------------------------------------------------------------------------------------------------------------------------------------------|-------------------------------------------------------------------|----------|-----|----|----------|----------|-------|-------------------------|
| NCT04491994 | HCQ                                                                                                                                                                                                     | Number of Participants with Progression                           | Aug 2020 | 540 | T  | Apr 2020 | May 2020 | 18-80 | Completed               |
| NCT04591600 | Ivermectin and Doxycycline; Standard of care                                                                                                                                                            | Mortality; Rate of progression disease;                           | Oct 2020 | 140 | T  | Jul 2020 | Oct 2020 | 16-86 | Completed               |
| NCT04485169 | Therapeutic Plasma Exchange                                                                                                                                                                             | Survival;                                                         | Sep 2020 | 280 | T  | Apr 2020 | Jul 2020 | 18-80 | Completed               |
| NCT04537962 | Colgate Periogard® mouthwash; Colgate Peroxyl® mouthwash; Colgate Total® Mouthwash; Toothpaste with sodium monofluorophosphate; Toothpaste with sodium fluoride and zinc; Toothpaste with tin fluoride. | Reduction of SARS-CoV-2 load in the oral mucosa and saliva        | May 2021 | 202 | SC | Jun 2020 | Aug 2021 | 18-90 | Enrolling by invitation |
| NCT04542213 | Linagliptin tablet; Insulin                                                                                                                                                                             | Glucose levels; Number of patients who achieve metabolic control; | Mar 2021 | 70  | T  | Aug 2020 | Feb 2021 | 18-75 | Completed               |
| NCT04532931 | Standard of care (Paracetamol); Artesunate-amodiaquine; Pyronaridine-artesunate; Favipiravir plus Nitazoxanide; Sofosbuvir/daclatasvir                                                                  | Incidence of SARS-CoV-2 clearance                                 | Dec 2020 | 250 | T  | Sep 2020 | Oct 2021 | 18-65 | Recruiting              |

*Footnote:* The studies were selected from the U.S. National Library of Medicine (assessed at ClinicalTrials.gov) by the descriptors “COVID-19 | Melatonin | Vitamin C | Zinc”.  
Abbreviations: *n*, Estimated Enrollment of participants; *Prim. Purp.*, Primary Purpose; *Estim. Compl. Date*: Estimated Completion Date; *NT*: not recruiting.
